# Supplementary material
Source: HighWire-hosted journal article supplement (https://jnnp.bmj.com/content/jnnp-2018-317969)
Supplement: inline-supplementary-material-1 [file inline-supplementary-material-1.pdf]

e-Table1

CSF cytokine/chemokine profiles of patients with MOG-IgG+ cases, AQP4-IgG+ NMOSD, MS, and control.

| Cytokine/chemokine<br>(pg/ml) |                | MOG-IgG+             | AQP4-IgG+           | MS                  | Control             | Detection<br>range |
|-------------------------------|----------------|----------------------|---------------------|---------------------|---------------------|--------------------|
| Th1                           | IFN $\gamma$   | 35.7 $\pm$ 43.9      | 34.6 $\pm$ 35.3     | 7.3 $\pm$ 0         | 7.3 $\pm$ 0         | 7.3-25422.7        |
|                               | TNF $\alpha$   | 10.2 $\pm$ 11.3      | 7.5 $\pm$ 5.6       | 4.2 $\pm$ 0.9       | 3.9 $\pm$ 0         | 3.9-65545.9        |
|                               | IP-10          | 8994.0 $\pm$ 11177.0 | 5842.1 $\pm$ 5283.2 | 4104.5 $\pm$ 4389.2 | 1333.2 $\pm$ 1815.5 | 29.9-31576.9       |
|                               | IL-2           | 4.2 $\pm$ 4.8        | 4.0 $\pm$ 5.4       | 3.2 $\pm$ 1.8       | 1.2 $\pm$ 0.6       | 1.0-18945.1        |
| Th2                           | IL-4           | 0.5 $\pm$ 0.8        | 0.5 $\pm$ 0.9       | 0.3 $\pm$ 0         | 0.3 $\pm$ 0         | 0.3-4976.4         |
|                               | IL-5           | 2.6 $\pm$ 3.9        | 1.5 $\pm$ 0.4       | 1.7 $\pm$ 0.5       | 1.4 $\pm$ 0         | 1.4-1360.5         |
|                               | IL-13          | 28.0 $\pm$ 56.1      | 30.8 $\pm$ 38.7     | 4.9 $\pm$ 2.7       | 0.4 $\pm$ 0         | 0.4-8427.3         |
|                               | Eotaxine       | 8.3 $\pm$ 2.8        | 10.2 $\pm$ 7.8      | 7.7 $\pm$ 0         | 7.7 $\pm$ 0         | 7.7-1478.2         |
| Th17                          | IL-6           | 1649.3 $\pm$ 3836.2  | 635.2 $\pm$ 1744.9  | 8.2 $\pm$ 15.6      | 2.8 $\pm$ 1.9       | 2.3-35993.1        |
|                               | IL-7           | 6.4 $\pm$ 9.0        | 7.4 $\pm$ 13.2      | 1.2 $\pm$ 1.0       | 0.8 $\pm$ 0         | 0.8-17706.3        |
|                               | IL-8           | 314.7 $\pm$ 584.5    | 240.2 $\pm$ 272.9   | 41.9 $\pm$ 22.3     | 10.3 $\pm$ 5.1      | 2.5-43211.2        |
|                               | IL-17A         | 17.8 $\pm$ 30.0      | 8.3 $\pm$ 15.0      | 3.2 $\pm$ 2.1       | 1.9 $\pm$ 0.8       | 1.7-28987.1        |
|                               | G-CSF          | 550.8 $\pm$ 772.7    | 70.0 $\pm$ 86.4     | 38.4 $\pm$ 0        | 38.4 $\pm$ 0        | 38.4-9308.0        |
|                               | GM-CSF         | 100.4 $\pm$ 80.5     | 213.5 $\pm$ 200.6   | 2.9 $\pm$ 9.8       | 0.7 $\pm$ 0         | 0.7-12951.9        |
| Treg                          | IL-10          | 4.9 $\pm$ 3.6        | 6.0 $\pm$ 4.0       | 2.2 $\pm$ 0         | 2.3 $\pm$ 0.2       | 2.2-30787.4        |
| Th9                           | IL-9           | 4.9 $\pm$ 3.9        | 3.1 $\pm$ 2.2       | 2.5 $\pm$ 1.0       | 1.6 $\pm$ 2.3       | 1.5-30549.8        |
| Others                        | IL-18          | 0.7 $\pm$ 0.9        | 0.7 $\pm$ 0.8       | 0.5 $\pm$ 0         | 0.5 $\pm$ 0         | 0.5-8360.8         |
|                               | IL1ra          | 62.8 $\pm$ 111.2     | 44.8 $\pm$ 51.2     | 5.7 $\pm$ 0.6       | 5.6 $\pm$ 0         | 5.6-86530.5        |
|                               | IL-12          | 3.8 $\pm$ 3.0        | 3.0 $\pm$ 1.3       | 2.3 $\pm$ 0         | 2.3 $\pm$ 0         | 2.3-37767.3        |
|                               | IL-15          | 26.1 $\pm$ 11.5      | 48.2 $\pm$ 36.0     | 20.3 $\pm$ 0        | 20.3 $\pm$ 0        | 20.3-1283.6        |
|                               | FGF basic      | 21.6 $\pm$ 13.0      | 20.8 $\pm$ 20.5     | 17.1 $\pm$ 4.4      | 1.1 $\pm$ 0         | 1.1-14542.0        |
|                               | MCP-1          | 153.2 $\pm$ 108.2    | 322.2 $\pm$ 310.8   | 46.8 $\pm$ 21.2     | 120.3 $\pm$ 63.8    | 1.5-1512.4         |
|                               | MIP-1 $\alpha$ | 2.0 $\pm$ 2.4        | 2.5 $\pm$ 2.5       | 0.3 $\pm$ 0.3       | 0.2 $\pm$ 0         | 0.2-943.1          |
|                               | MIP-18         | 29.2 $\pm$ 16.5      | 35.0 $\pm$ 33.3     | 18.1 $\pm$ 8.8      | 8.7 $\pm$ 4.8       | 0.6-656.0          |
|                               | PDGFbb         | 4.7 $\pm$ 6.5        | 1.6 $\pm$ 4.3       | 0.2 $\pm$ 0         | 0.2 $\pm$ 0         | 22.9-24433.8       |
|                               | RANTES         | 19.7 $\pm$ 9.9       | 20.5 $\pm$ 13.7     | 16.6 $\pm$ 4.1      | 15.7 $\pm$ 0        | 15.7-972.6         |
| VEGF                          | 9.7 $\pm$ 12.5 | 5.1 $\pm$ 9.6        | 6.1 $\pm$ 3.9       | 0                   | 1.8-29115.2         |                    |

Values indicate mean  $\pm$  SD pg/ml

Abbreviations: CSF=cerebrospinal fluid; MOG=myelin oligodendrocyte glycoprotein;

AQP4=aquaporin4; MS=multiple sclerosis; Th=T helper cell; Treg=Regulatory T cells;  
IFN=interferon; TNF=tumor necrosis factor; IP=IFN- $\gamma$  inducible protein;  
IL=interleukin; G-CSF=granulocyte colony stimulating factor; GM-CSF=granulocyte  
monocyte colony stimulating factor; FGF=fibroblast growth Factor; MCP=monocyte  
chemotactic protein; MIP=macrophage inflammatory protein; PDGF-BB= platelet  
derived growth factor-BB; RANTES=regulated on activation normal T cell expressed  
and secreted; VEGF= vascular endothelial growth factor.
